# Supplementary material for: Activation and adsorption performance of sewage sludge carbon for CO2: unusual enhancement effect of HF treatment
Source: Royal Society of Chemistry journal article supplement (doi:10.1039/d1en00037c), 2021-01-01
Supplement: d1en00037c1.pdf [file d1en00037c1.pdf]

## Activation and Adsorption Performance of Sewage Sludge Carbon for CO<sub>2</sub>: Unusual Enhancement Effect of HF Treatment

(Supporting Information)

Jingxiang Sun,<sup>1,2</sup> Jinzhu Zhu,<sup>1,2</sup> Shuanghong Tian,<sup>1,2</sup> Wen Yan,<sup>1,2</sup> Jinxi Feng<sup>1,2\*</sup>

Ya Xiong<sup>1,2\*</sup>

1 School of Environmental Science and Engineering, Sun Yat-Sen University, no. 135, Xingang Xi Road, Guangzhou 510275, P. R. China

2 Guangdong Provincial Key Laboratory of Environmental Pollution Control and Remediation Technology, Sun Yat-Sen University, no. 135, Xingang Xi Road, Guangzhou 510275, P. R. China

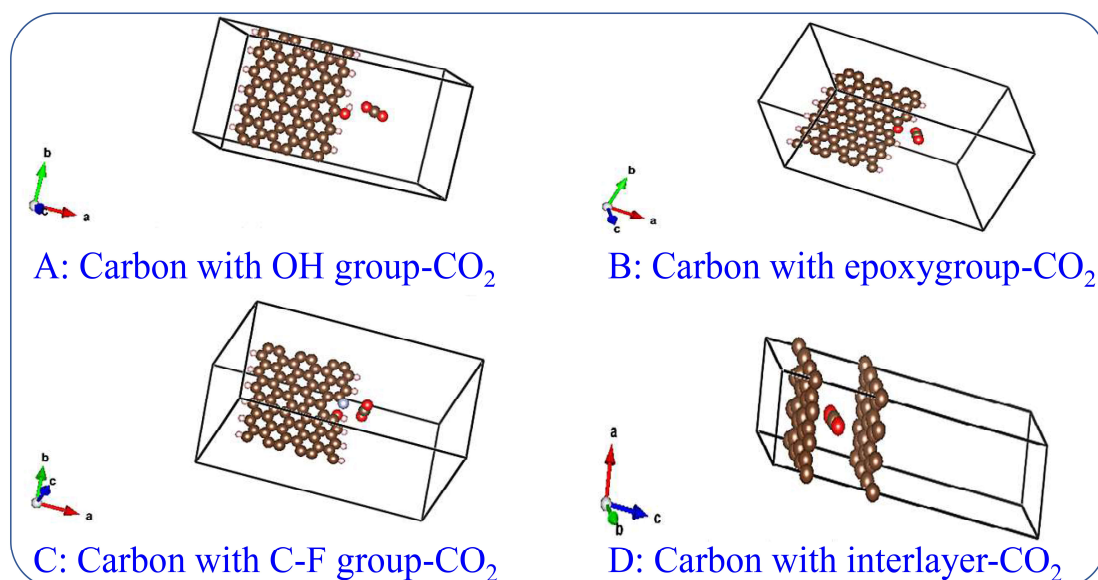

Figure S1. CO<sub>2</sub> adsorption models of the expanded interlayer space-type ultra-micropores and typical functional groups (brown: carbon atom, red: oxygen atom, and grey: fluorine atom)

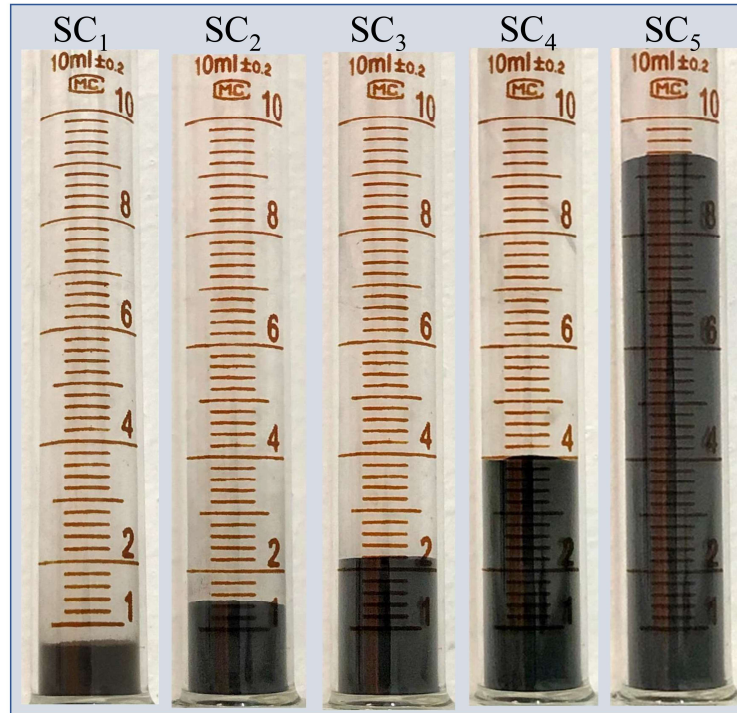

Figure S2. Photos showing packing density differences of five sludge carbons (1 g)

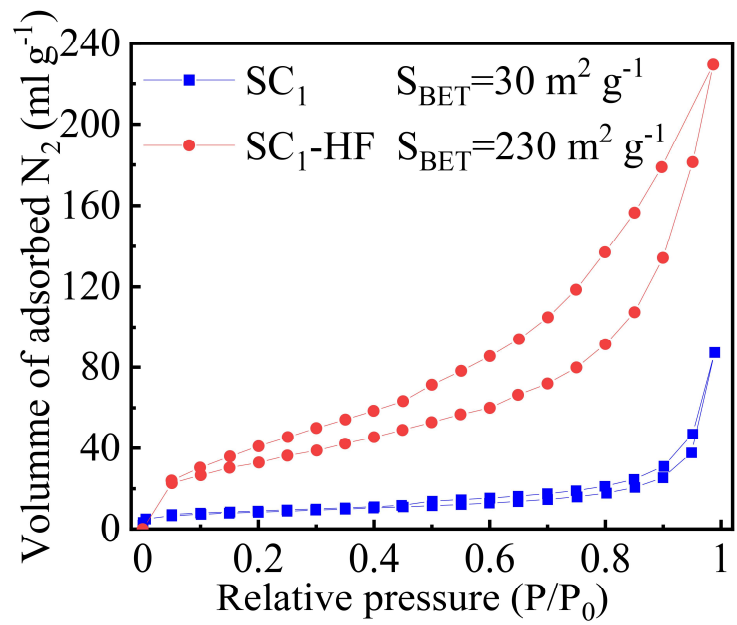

Figure S3. N<sub>2</sub> adsorption-desorption isotherms of SC<sub>1</sub> and SC<sub>1</sub>- HF treatment

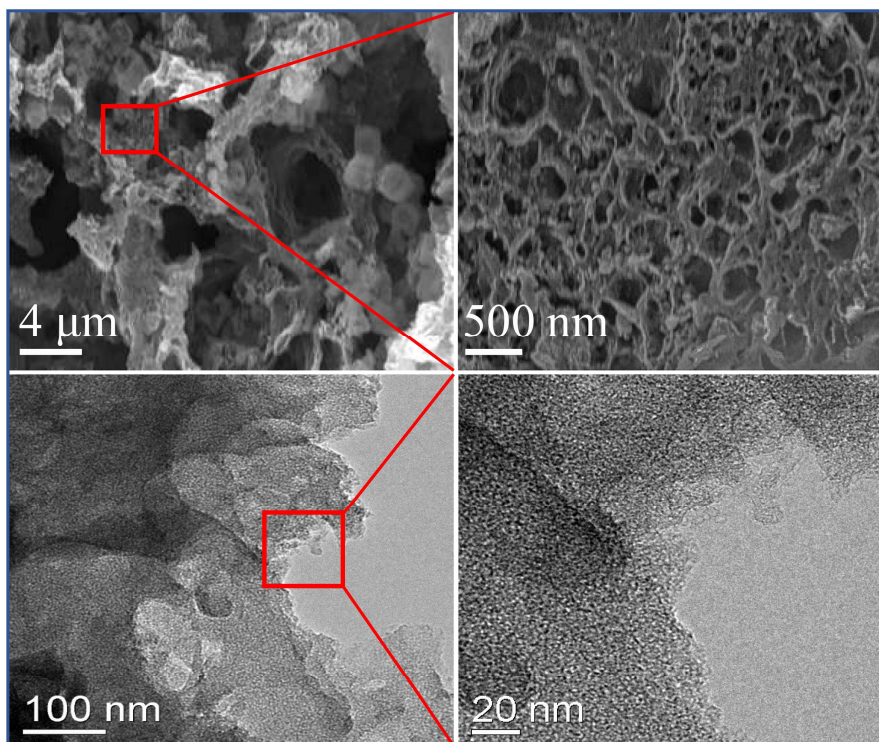

Figure S4. Hierarchically porous textures (SEM and HRTEM) of SC<sub>5</sub>

surface

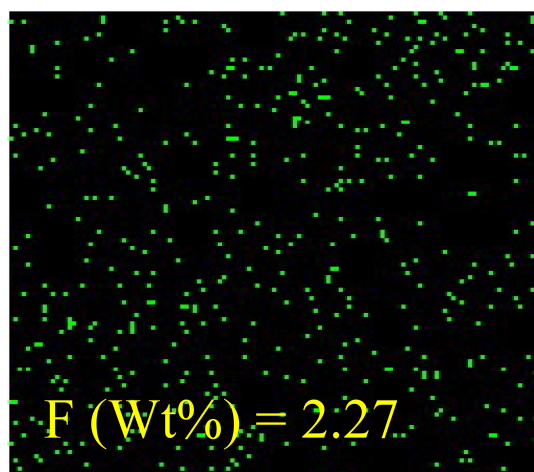

Figure S5. F mapping of SC<sub>5</sub>

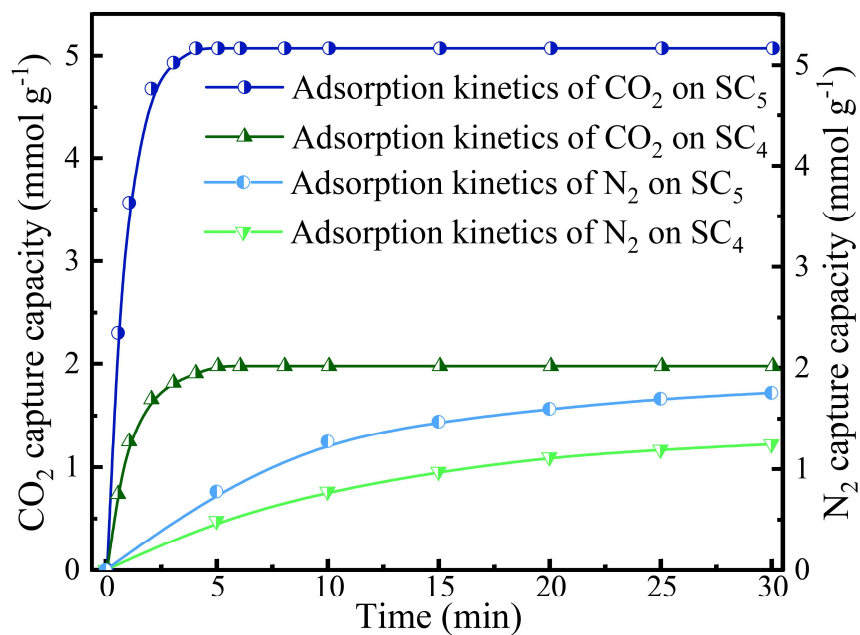

Figure S6. Adsorption selectivity of SC<sub>4</sub> and SC<sub>5</sub> for CO<sub>2</sub> and N<sub>2</sub>  
(adsorption condition: 25 °C, 1 bar)

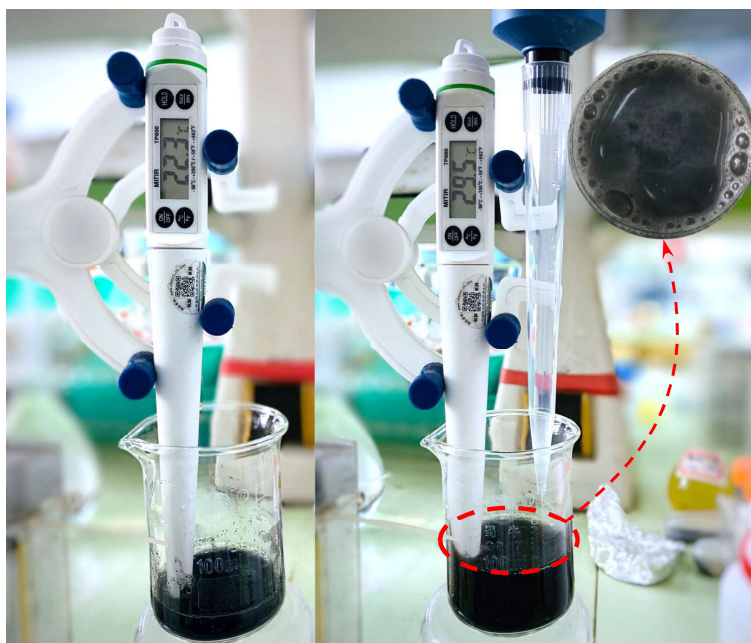

Figure S7. The temperature of sludge carbon-containing suspended slurry  
before and after adding HF

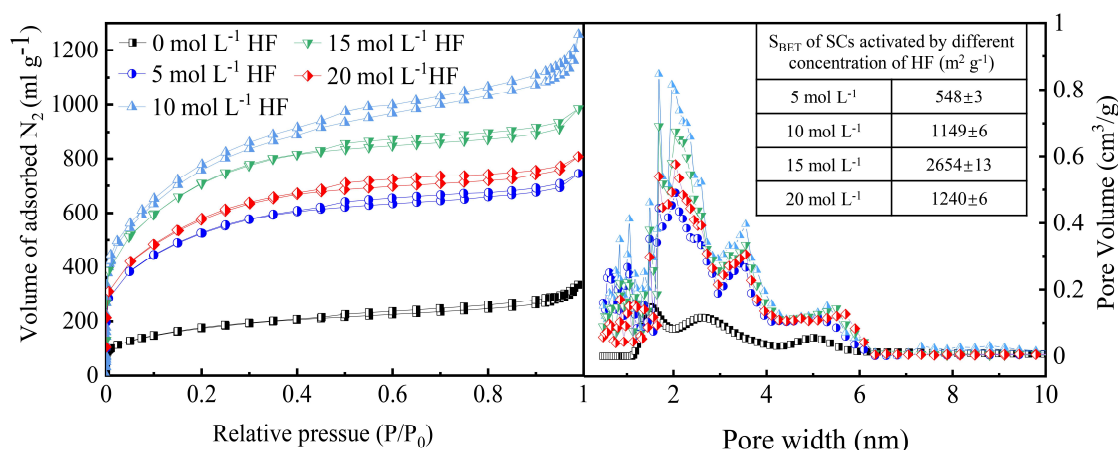

Figure S8. N<sub>2</sub> adsorption-desorption isotherms and Pore size distribution of SCs activated by different concentration of HF (insert table: BET specific surface area)

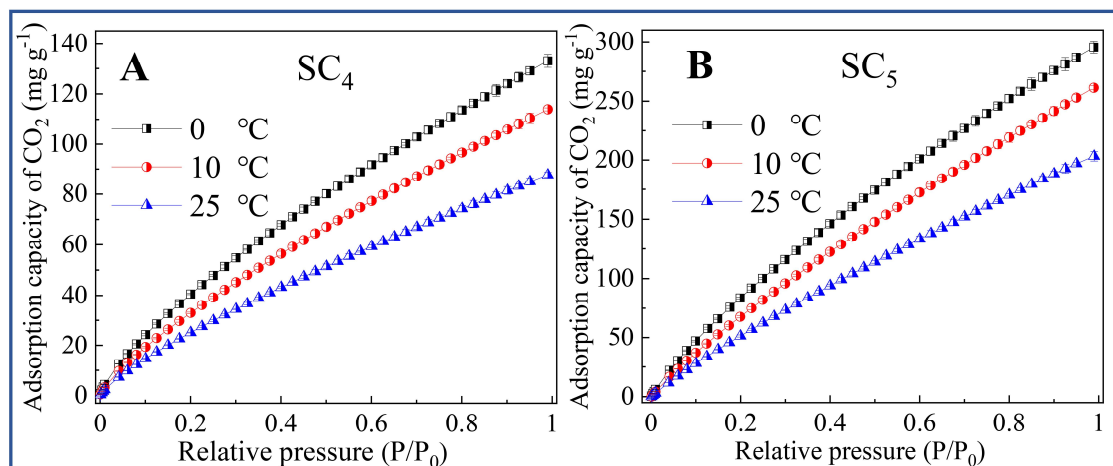

Figure S9. Adsorption isotherms of CO<sub>2</sub> on SC<sub>4</sub> and SC<sub>5</sub> at different temperatures

**Table S1. CO<sub>2</sub> adsorption capacities of various carbon materials****(25 °C, 1 bar)**

| Adsorbents                         | $S_{\text{BET}}$ (m <sup>2</sup> g <sup>-1</sup> ) | CO <sub>2</sub> Adsorption Capacity (mmol g <sup>-1</sup> ) | Refs. |
|------------------------------------|----------------------------------------------------|-------------------------------------------------------------|-------|
| Crab shell carbon                  | 1196                                               | 4.4                                                         | S1    |
| Chestnut carbon                    | 747                                                | 2.3                                                         | S2    |
| Rice husk carbon                   | 2695                                               | 3.7                                                         | S3    |
| Olive stones carbon                | 1215                                               | 3.1                                                         | S4    |
| African palm shell carbon          | 1890                                               | 4.4                                                         | S5    |
| Camellia Japonica carbon           | 3537                                               | 2.8                                                         | S6    |
| Fern leaves carbon                 | 1593                                               | 4.1                                                         | S7    |
| Arundo donax carbon                | 3298                                               | 2.2                                                         | S8    |
| Celtuce leave carbon               | 3404                                               | 4.4                                                         | S9    |
| Pine nut shell                     | 1486                                               | 5.0                                                         | S10   |
| Mesoporous carbon                  | 1020                                               | 2.1                                                         | S11   |
| AC (from Fuchen Chem. Reagent Co.) | 860                                                | 1.2                                                         | *     |
| SC <sub>5</sub>                    | 2654                                               | 4.9                                                         | *     |

\* These data were obtained from this study.

## References

- S1. Chen, T.; Deng, S.; Wang, B.; Huang, J.; Wang, Y.; Yu, G. CO<sub>2</sub> adsorption on Crab Shell Derived Activated Carbons: Contribution of Micropores and Nitrogen-Containing Groups. *RSC Adv.* **2015**, *5* (60), 48323–48330.
- S2. Nelson, K. M.; Mahurin, S. M.; Mayes, R. T.; Williamson, B.; Teague, C. M.; Binder, A. J.; Baggetto, L.; Veith, G. M.; Dai, S. Preparation and CO<sub>2</sub> Adsorption Properties of Soft-Templated Mesoporous Carbons Derived from Chestnut Tannin Precursors. *Microporous Mesoporous Mater.* **2016**, *222*, 94–103.
- S3. Li, D.; Ma, T.; Zhang, R.; Tian, Y.; Qiao, Y. Preparation of Porous Carbons with High Low-Pressure CO<sub>2</sub> Uptake by KOH Activation of Rice Husk Char. *Fuel (Lond.)* **2015**, *139*, 68–70.
- S4. González, A. S.; Plaza, M. G.; Rubiera, F.; Pevida, C. Sustainable Biomass-Based Carbon Adsorbents for Post-Combustion CO<sub>2</sub> Capture. *Chem. Eng. J.* **2013**, *230*, 456–465.
- S5. Ello, A. S.; de Souza, L. K. C.; Trokourey, A.; Jaroniec, M. Development of Microporous Carbons for CO<sub>2</sub> Capture by KOH Activation of African Palm Shells. *J. CO<sub>2</sub> util.* **2013**, *2*, 35–38.
- S6. Coromina, H. M.; Walsh, D. A.; Mokaya, R. Biomass-Derived Activated Carbon with Simultaneously Enhanced CO<sub>2</sub> Uptake for Both Pre and Post Combustion Capture Applications. *J. Mater. Chem. A Mater. Energy Sustain.* **2016**, *4* (1), 280–289.
- S7. Serafin, J.; Narkiewicz, U.; Morawski, A. W.; Wróbel, R. J.; Michalkiewicz, B. Highly Microporous Activated Carbons from Biomass for CO<sub>2</sub> Capture and Effective Micropores at Different Conditions. *J. CO<sub>2</sub> util.* **2017**, *18*, 73–79.
- S8. Singh, G.; Lakhi, K. S.; Kim, I. Y.; Kim, S.; Srivastava, P.; Naidu, R.; Vinu, A. Highly Efficient Method for the Synthesis of Activated Mesoporous Biocarbons with Extremely High Surface Area for High-Pressure CO<sub>2</sub> Adsorption. *ACS Appl. Mater. Interfaces* **2017**, *9* (35), 29782–29793.
- S9. Wang, R.; Wang, P.; Yan, X.; Lang, J.; Peng, C.; Xue, Q. Promising Porous Carbon Derived from Celtuce Leaves with Outstanding Supercapitance and CO<sub>2</sub> Capture Performance. *ACS Appl. Mater. Interfaces* **2012**, *4* (11), 5800–5806.
- S10. Deng, S.; Wei, H.; Chen, T.; Wang, B.; Huang, J.; Yu, G. Superior CO<sub>2</sub> Adsorption on Pine Nut Shell-Derived Activated Carbons and the Effective Micropores at Different Temperatures. *Chem. Eng. J.* **2014**, *253*, 46–54.
- S11. Sevilla, M.; Fuertes, A. B. CO<sub>2</sub> Adsorption by Activated Templated Carbons. *J. Colloid Interface Sci.* **2012**, *366* (1), 147–154.
